# Supplementary material
Source: Springer Nature journal article supplement (https://www.springermedizin.de/resource/supplementary/12984_2011_364_MOESM8_ESM.pdf/9605866)

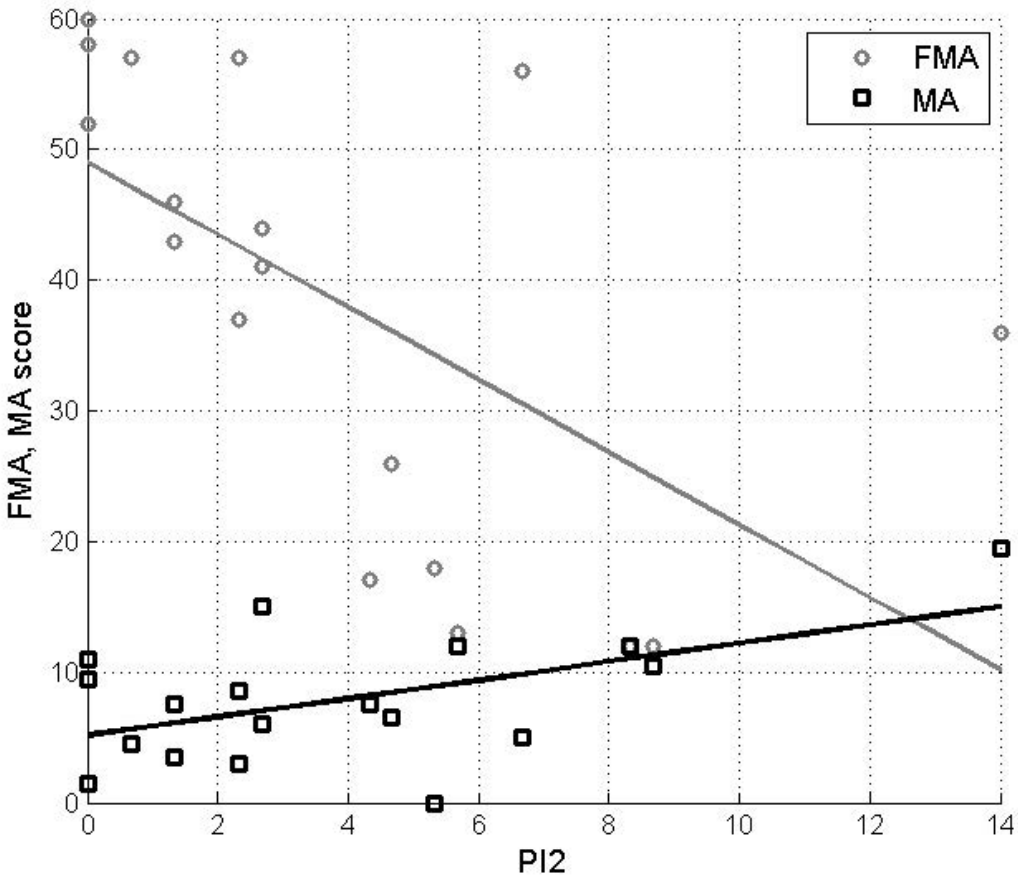

Supplement: MOESM8 [file 9605866]
